# Supplementary material for: Pravastatin Promotes Endothelial Colony-Forming Cell Function, Angiogenic Signaling and Protein Expression In Vitro
Source: PubMed Central journal article supplement (PMC7825508; doi:10.3390/jcm10020183), 2021-01-06
Supplement: jcm-10-00183-s001.pdf [file jcm-10-00183-s001.pdf]

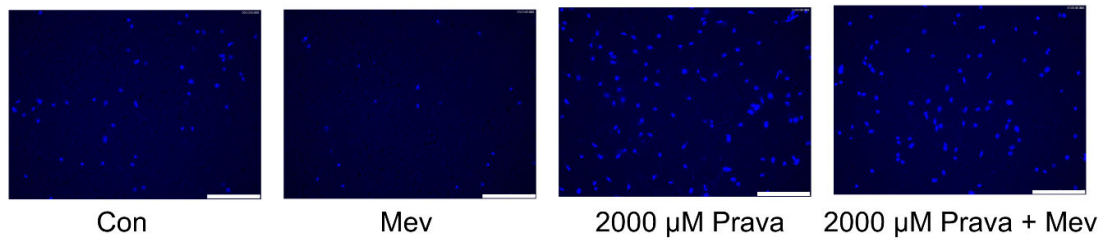

**Supplemental Figure S1.** Mevalonate decreases directional ECFC migration and reduces pravastatin (2000  $\mu\text{M}$ ) induced increase in directional migration. Representative images of DAPI-stained migrated ECFCs after treatment with 2000  $\mu\text{M}$  pravastatin with or without 200  $\mu\text{M}$  mevalonate. Con, control; Prava, pravastatin; Mev, mevalonate. Scale bar 150  $\mu\text{m}$ .

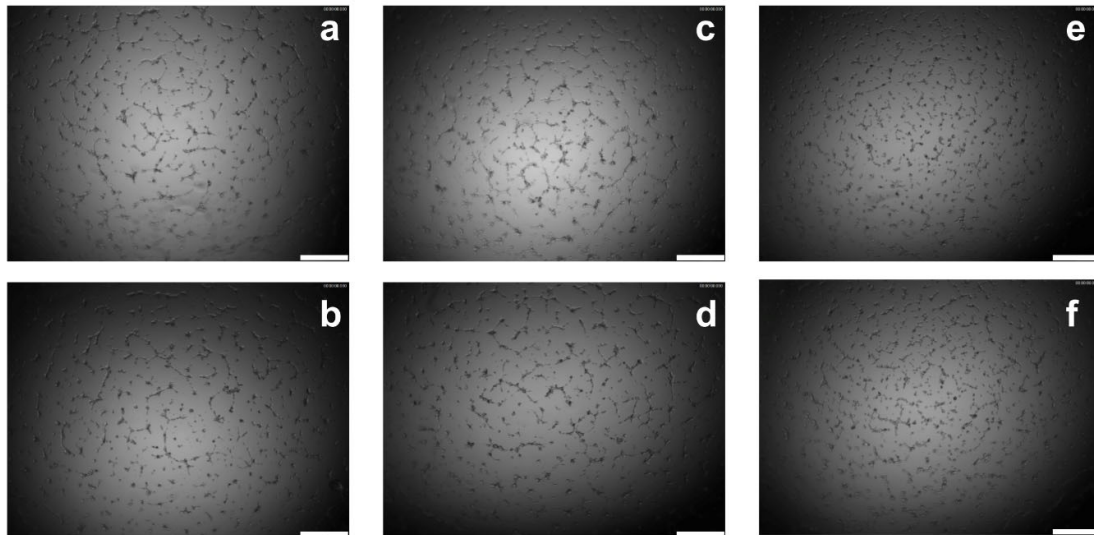

**Supplemental Figure S2.** Mevalonate (200  $\mu\text{M}$ ) modulates pravastatin's effect on ECFCs' tube formation ability. Representative images of ECFCs' tube formation after 6 h in the presence of medium only (a), mevalonate (b), 20  $\mu\text{M}$  pravastatin (c), 20  $\mu\text{M}$  pravastatin + 200  $\mu\text{M}$  mevalonate (d), 2000  $\mu\text{M}$  pravastatin (e) or 2000  $\mu\text{M}$  pravastatin + 200  $\mu\text{M}$  mevalonate (f). Scale bar 500  $\mu\text{m}$ .
